# Supplementary material for: Connections between Transcription Downstream of Genes and cis-SAGe Chimeric RNA
Source: MDPI journal article supplement (doi:10.3390/genes8110338), 2017-11-22
Supplement: s1 [file s1]

**Figure S1:** Gel-electrophoresis picture of representative cis-SAGe fusions.

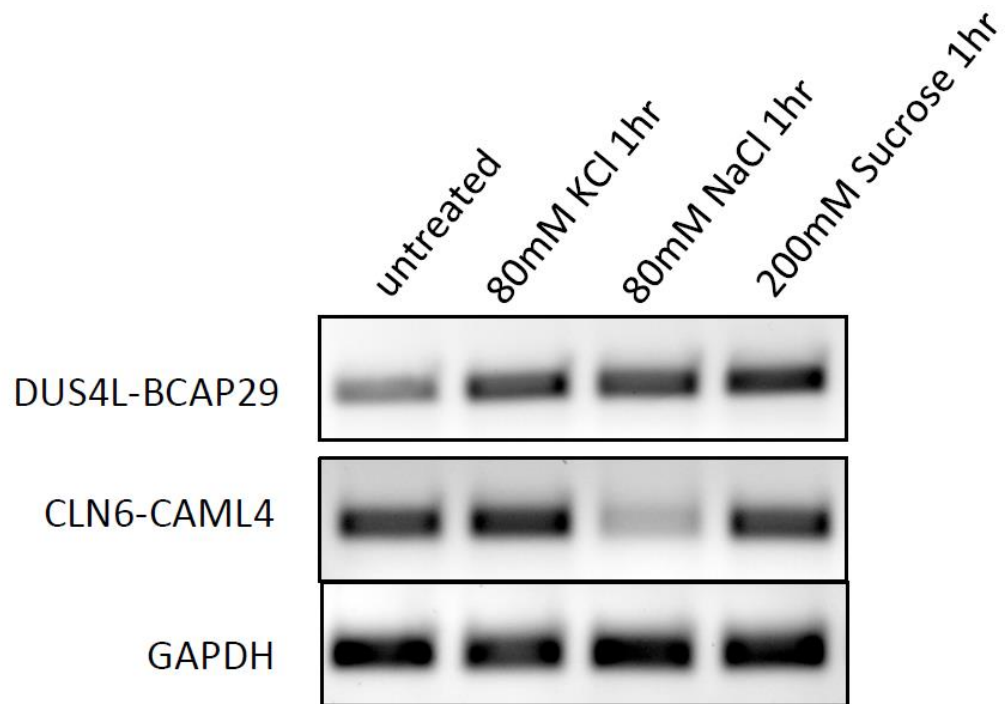

**Figure S2:** Gel-electrophoresis picture of representative DoGs.

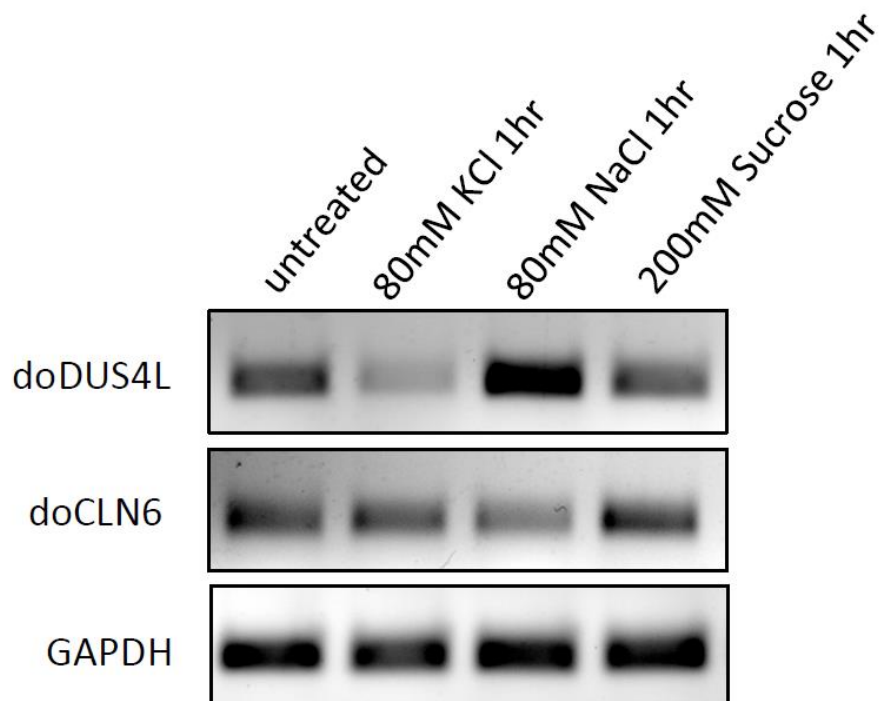

**Table S1.** Primer Sequences

| Gene name            | Forward Primer           | Reverse Primer           |
|----------------------|--------------------------|--------------------------|
| doCLN6               | gcctcaaactctgacagggga    | ctttgcacacaggcgcatag     |
| doCTNNBIP1           | agacacacatccaaggggtcc    | tccggttccaagctctctg      |
| doCTSC               | tcggctgacacatgagaaca     | tctgacttccatgccagttag    |
| doDUS4L              | acccacctttcgtaccagtc     | taaagggccaggatgaggtg     |
| doSLC29AB1           | cagtctgcagtgtgtttgg      | ggcaggaggtggtaaagcaa     |
| doUBA2               | tccaagctttccctaggtgc     | gctggaggtggaaagaagct     |
| CTNNBIP1-<br>CLSTN1  | attcagcagaaggtccgagt     | tgtgactatgccgtggtagg     |
| DUS4L-BCAP29         | gccagtgcactatgattcca     | ggaggaataaaaaggtaggcagaa |
| CLN6-CALML4          | ttccacctcgacctctgggt     | ccaccatcaacatggctaga     |
| SLC29A1-<br>HSP90AB1 | tgttgaggtcaagtccagca     | ctctccatggtgcacttcct     |
| UBA2-WTIP            | ttgaagttgttggtgatgccccg  | cacacgagtcgcaggtgaagc    |
| CTSC-RAB38           | cctgtggcagctgctactcatttg | actgcttcaaattgtggctggcc  |
